# Supplementary material for: Implementation of Newborn Screening for Conditions in the United States First Recommended during 2010–2018
Source: MDPI journal article supplement (doi:10.3390/ijns9020020), 2023-04-06
Supplement: s1 [file s1]

## Supplementary Materials:

| Table S1: Years from Addition to RUSP to Full Population Screening (as of December 2022) |                    |                             |                       |                             |                             |                    |
|------------------------------------------------------------------------------------------|--------------------|-----------------------------|-----------------------|-----------------------------|-----------------------------|--------------------|
| Condition<br>(Month/Year Added to<br>RUSP)                                               | SCID<br>(May 2010) | CCHD<br>(September<br>2011) | Pompe<br>(March 2015) | MPS I<br>(February<br>2016) | X-ALD<br>(February<br>2016) | SMA<br>(July 2018) |
| AVERAGE                                                                                  | 4.3                | 2.7                         | 4.0*                  | 3.2*                        | 3.5*                        | 2.1*               |
| Alabama                                                                                  | 8.3                | 1.8                         | PI                    | PI                          | PI                          | 3.6                |
| Alaska                                                                                   | 6.2                | 2.3                         | NS                    | NS                          | NS                          | 4.0                |
| Arizona                                                                                  | 7.3                | 3.8                         | PI                    | PI                          | 4.9                         | 3.5                |
| Arkansas                                                                                 | 5.0                | 1.9                         | NS                    | NS                          | 6.0                         | 1.7                |
| California                                                                               | 0.3                | 1.8                         | 3.4                   | 2.5                         | 0.6                         | 1.9                |
| Colorado                                                                                 | 1.8                | 4.3                         | 7.3                   | 6.3                         | NS                          | 1.5                |
| Connecticut                                                                              | 1.3                | 1.3                         | 5.8                   | 4.9                         | 0.4                         | 1.5                |
| Delaware                                                                                 | 2.2                | 1.7                         | 4.8                   | 3.9                         | 3.9                         | 1.5                |
| District of Columbia                                                                     | 3.8                | 4.0                         | 3.1                   | 2.2                         | 2.2                         | PI                 |
| Florida                                                                                  | 2.1                | 3.1                         | 4.9                   | 4.0                         | 2.3                         | 1.8                |
| Georgia                                                                                  | 6.1                | 2.8                         | 6.5                   | 5.6                         | 4.3                         | 1.1                |
| Guam                                                                                     | 3.9                | 1.8                         | NS                    | NS                          | NS                          | NS                 |
| Hawaii                                                                                   | 4.8                | 3.8                         | PI                    | PI                          | NS                          | NS                 |
| Idaho                                                                                    | 5.7                | 6.8                         | 6.9                   | 6.0                         | 6.0                         | 3.6                |
| Illinois                                                                                 | 4.1                | 2.0                         | 0.3                   | -0.7                        | 3.3                         | 1.9                |
| Indiana                                                                                  | 8.2                | 0.3                         | 5.3                   | 4.4                         | 5.4                         | 0.0                |
| Iowa                                                                                     | 4.2                | 1.8                         | PI                    | PI                          | NS                          | 3.2                |
| Kansas                                                                                   | 7.5                | 6.4                         | 5.8                   | 4.9                         | PI                          | 1.6                |
| Kentucky                                                                                 | 5.8                | 2.3                         | 0.9                   | 0.0                         | 2.4                         | 1.1                |
| Louisiana                                                                                | 8.6                | 1.9                         | 6.8                   | 5.9                         | NS                          | 3.5                |
| Maine                                                                                    | 4.3                | 1.8                         | 6.1                   | 5.2                         | 5.2                         | 2.8                |
| Maryland                                                                                 | 5.8                | 2.0                         | 4.3                   | 3.3                         | PI                          | 0.9                |
| Massachusetts                                                                            | -1.2               | 3.3                         | 2.8                   | 1.9                         | 1.9                         | -0.5               |
| Michigan                                                                                 | 1.3                | 2.6                         | 2.4                   | 1.5                         | 3.7                         | 1.7                |
| Minnesota                                                                                | 2.7                | 1.9                         | 2.4                   | 1.5                         | 1.0                         | -0.3               |
| Mississippi                                                                              | 1.6                | 3.2                         | 1.3                   | NS                          | NS                          | 1.3                |
| Missouri                                                                                 | 6.7                | 2.3                         | -2.2                  | -3.1                        | 5.8                         | 0.5                |
| Montana                                                                                  | 5.2                | 2.8                         | PI                    | PI                          | NS                          | 2.7                |
| Nebraska                                                                                 | 4.3                | 2.0                         | 3.3                   | 2.4                         | 2.4                         | 2.3                |
| Nevada                                                                                   | 7.7                | 3.8                         | NS                    | NS                          | NS                          | NS                 |
| New Hampshire                                                                            | 5.2                | 0.9                         | 5.4                   | 4.5                         | 4.5                         | 1.4                |
| New Jersey                                                                               | 4.1                | 0.0                         | 4.3                   | 3.4                         | 6.8                         | 3.5                |
| New Mexico                                                                               | 4.3                | 2.8                         | 6.2                   | 5.3                         | PI                          | 3.9                |
| New York                                                                                 | 0.3                | 2.3                         | -0.4                  | 2.7                         | -2.9                        | 0.3                |
| North Carolina                                                                           | 7.5                | 2.8                         | PI                    | PI                          | 6.0                         | 2.8                |
| North Dakota                                                                             | 6.2                | 1.9                         | PI                    | NS                          | NS                          | 3.2                |
| Ohio                                                                                     | 3.2                | 3.1                         | 2.7                   | 1.8                         | 6.7                         | 4.3                |
| Oklahoma                                                                                 | 4.8                | 1.8                         | 6.0                   | 5.1                         | 5.1                         | 2.7                |
| Oregon                                                                                   | 4.0                | 1.8                         | 3.6                   | 2.7                         | NS                          | 3.9                |
| Pennsylvania                                                                             | 3.2                | 3.0                         | 0.9                   | 0.9                         | 1.2                         | 0.7                |
| Puerto Rico                                                                              | 5.2                | 3.2                         | NS                    | NS                          | NS                          | NS                 |
| Rhode Island                                                                             | 4.3                | 3.8                         | 2.8                   | 1.9                         | 1.9                         | 2.0                |
| South Carolina                                                                           | 4.8                | 1.8                         | 5.9                   | 5.0                         | PI                          | 4.2                |
| South Dakota                                                                             | 5.3                | 1.8                         | 7.5                   | PI                          | PI                          | 3.2                |
| Tennessee                                                                                | 5.7                | 1.7                         | 2.3                   | 1.4                         | 2.3                         | 1.6                |
| Texas                                                                                    | 2.6                | 2.0                         | PI                    | PI                          | 3.5                         | 2.9                |
| Utah                                                                                     | 3.2                | 3.1                         | PI                    | PI                          | 4.6                         | -0.5               |
| Vermont                                                                                  | 6.2                | 4.8                         | 4.2                   | 3.3                         | 3.3                         | 0.8                |
| Virginia                                                                                 | 5.1                | 3.3                         | 3.8                   | 2.9                         | 6.1                         | 3.7                |
| Washington                                                                               | 3.7                | 3.8                         | 4.6                   | 3.7                         | 2.1                         | 2.1                |
| West Virginia                                                                            | 3.8                | 0.8                         | NS                    | NS                          | PI                          | 1.3                |
| Wisconsin                                                                                | -1.8               | 2.5                         | 6.8                   | NS                          | PI                          | 1.3                |
| Wyoming                                                                                  | 1.8                | 6.3                         | NS                    | NS                          | NS                          | 1.5                |
| MINIMUM                                                                                  | -1.8               | 0                           | -2.2                  | -3.1                        | -2.9                        | -0.5               |
| MAXIMUM                                                                                  | 8.6                | 6.8                         | 7.5*                  | 6.3*                        | 6.8*                        | 4.3*               |

\*Of states offering Universal Screening as of December 2022 | NS = Not Screened | PI = Pursuing Implementation

**Table S2: Number of states that implemented population screening within 3 years of a conditions' addition to the RUSP**

| Condition | Number of States | States                                                                                                                                                                                                                                                                                                                                                                                |
|-----------|------------------|---------------------------------------------------------------------------------------------------------------------------------------------------------------------------------------------------------------------------------------------------------------------------------------------------------------------------------------------------------------------------------------|
| SCID      | 13               | California, Colorado, Connecticut, Delaware, Florida, Massachusetts, Michigan, Minnesota, Mississippi, New York, Texas, Wisconsin, Wyoming                                                                                                                                                                                                                                            |
| CCHD      | 35               | Alabama, Alaska, Arkansas, California, Connecticut, Delaware, Georgia, Guam, Illinois, Indiana, Iowa, Kentucky, Louisiana, Maine, Maryland, Michigan, Minnesota, Missouri, Montana, Nebraska, New Hampshire, New Jersey, New Mexico, New York, North Carolina, North Dakota, Oklahoma, Oregon, Pennsylvania, South Carolina, South Dakota, Tennessee, Texas, West Virginia, Wisconsin |
| Pompe     | 12               | Illinois, Kentucky, Massachusetts, Michigan, Minnesota, Mississippi, Missouri, New York, Ohio, Pennsylvania, Rhode Island, Tennessee                                                                                                                                                                                                                                                  |
| MPS I     | 16               | California, District of Columbia, Illinois, Kentucky, Massachusetts, Michigan, Minnesota, Missouri, Nebraska, New York, Ohio, Oregon, Pennsylvania, Rhode Island, Tennessee, Virginia                                                                                                                                                                                                 |
| X-ALD     | 13               | California, Connecticut, District of Columbia, Florida, Kentucky, Massachusetts, Minnesota, Nebraska, New York, Pennsylvania, Rhode Island, Tennessee, Washington                                                                                                                                                                                                                     |
| SMA       | 34               | Arkansas, California, Colorado, Connecticut, Delaware, Florida, Georgia, Illinois, Indiana, Kansas, Kentucky, Maine, Maryland, Massachusetts, Michigan, Minnesota, Mississippi, Missouri, Montana, Nebraska, New Hampshire, New York, North Carolina, Oklahoma, Pennsylvania, Rhode Island, Tennessee, Texas, Utah, Vermont, Washington, West Virginia, Wisconsin, Wyoming            |

**Table S3: Severe Combined Immunodeficiency Newborn Screening Implementation**

| Dates (N = 53) |      |      |      |      |      |      |      |      |      |      |    |
|----------------|------|------|------|------|------|------|------|------|------|------|----|
|                |      |      |      |      |      | NM   |      |      |      |      |    |
|                |      |      |      |      |      | NE   |      |      |      |      |    |
|                |      |      |      |      |      | RI   |      |      |      |      |    |
|                |      |      |      |      |      | ME   | SD   |      |      |      |    |
|                |      |      |      |      |      | IA   | PR   | VT   |      |      |    |
|                |      |      |      |      |      | NJ   | NH   | ND   |      |      |    |
| TX             |      |      |      |      |      | IL   | MT   | AK   |      |      |    |
| DE             |      |      |      |      |      | OR   | VA   | GA   |      |      |    |
| FL             |      |      |      |      |      | UT   | GU   | AR   | MD   | NC   | LA |
| WY             |      |      |      |      |      | PA   | WV   | SC   | KY   | KS   | AL |
| NY             |      |      |      | MI   | CO   | OH   | DC   | HI   | TN   | AZ   | IN |
| WI             | MA   | CA   | CT   | MS   | MN   | WA   | OK   | ID   | MO   | NV   |    |
| 2008           | 2009 | 2010 | 2011 | 2012 | 2013 | 2014 | 2015 | 2016 | 2017 | 2018 |    |
| RUSP           |      |      |      |      |      |      |      |      |      |      |    |

**Table S4: Critical Congenital Heart Disease Newborn Screening**

| Implementation Dates (N = 53) |    |
|-------------------------------|----|
| TX                            |    |
| NE                            |    |
| MD                            |    |
| IL                            | VA |

|      |      |      |      |      |      |      |      |
|------|------|------|------|------|------|------|------|
|      |      | ND   | PR   |      |      |      |      |
|      |      | MN   | MS   |      |      |      |      |
|      |      | LA   | UT   |      |      |      |      |
|      |      | AR   | OH   |      |      |      |      |
|      |      | SD   | FL   |      |      |      |      |
|      |      | OK   | PA   |      |      |      |      |
|      |      | ME   | NC   |      |      |      |      |
|      |      | IA   | NM   |      |      |      |      |
|      |      | CA   | MT   |      |      |      |      |
|      |      | SC   | GA   | DC   |      |      |      |
|      |      | OR   | MI   | WA   |      |      |      |
|      |      | GU   | WI   | RI   |      |      |      |
|      |      | AL   | NY   | NV   |      |      |      |
|      | NH   | TN   | MO   | HI   |      |      |      |
|      | WV   | DE   | KY   | AZ   | VT   |      | KS   |
| NJ   | IN   | CT   | AK   | MA   | CO   | WY   | ID   |
| 2011 | 2012 | 2013 | 2014 | 2015 | 2016 | 2017 | 2018 |
| RUSP |      |      |      |      |      |      |      |

Table S5: Pompe Newborn Screening Implementation Dates (as of December 2022; n = 37)

| 2000-2001 |      |      |      |      |      |      |      |      |      |    |    |    |    |    |
|-----------|------|------|------|------|------|------|------|------|------|----|----|----|----|----|
|           |      |      |      |      |      |      |      | GA   |      |    |    |    |    |    |
|           |      |      |      |      |      |      |      | NM   |      |    |    |    |    |    |
|           |      |      |      |      |      |      |      | ME   |      |    |    |    |    |    |
|           |      |      |      |      |      |      |      | OR   |      |    |    |    |    |    |
|           |      |      |      |      |      |      |      | CA   | WA   | OK | SD |    |    |    |
|           |      |      |      |      |      |      |      | OH   | NE   | NJ | SC | CO |    |    |
|           |      |      |      |      |      |      |      | MS   | MN   | DC | VT | NH | KS | ID |
|           |      |      |      |      |      |      |      | PA   | MI   | RI | VA | IN | FL | WI |
| MO        | NY   | IL   | KY   | TN   | MA   | MN   | DE   | CT   | LA   |    |    |    |    |    |
| 2013      | 2014 | 2015 | 2016 | 2017 | 2018 | 2019 | 2020 | 2021 | 2022 |    |    |    |    |    |
| RUSP      |      |      |      |      |      |      |      |      |      |    |    |    |    |    |

**Table S6: Mucopolysaccharidosis, Type I Newborn Screening Implementation Dates (as of December 2022, n = 34)**

|      |      |      |      |      |      |      |      |      | GA   |
|------|------|------|------|------|------|------|------|------|------|
|      |      |      |      |      |      | NY   | NM   |      |      |
|      |      |      |      |      |      |      | OR   | ME   |      |
|      |      |      |      | OH   | CA   | WA   | OK   |      |      |
|      |      |      |      | MN   | NE   | NJ   | SC   |      |      |
|      |      |      |      | MI   | DC   | MD   | NH   | KS   | CO   |
|      |      |      |      | TN   | RI   | VT   | IN   | FL   | ID   |
| MO   | IL   | KY   | PA   | MA   | VA   | DE   | CT   | LA   |      |
| 2013 | 2014 | 2015 | 2016 | 2017 | 2018 | 2019 | 2020 | 2021 | 2022 |
| RUSP |      |      |      |      |      |      |      |      |      |

**Table S7: X-linked Adrenoleukodystrophy Newborn Screening Implementation Dates (as of December 2022, n = 30)**

|  |    |    |    |    |    |
|--|----|----|----|----|----|
|  | NE |    |    |    |    |
|  | KY |    |    |    |    |
|  | TN |    |    |    | NJ |
|  | FL |    |    | MO | AR |
|  | DC | MI | UT | IN | OH |

|      |      |      |      |      |      |      |      |      |      |
|------|------|------|------|------|------|------|------|------|------|
|      |      |      |      |      | WA   | TX   | NH   | ME   | VA   |
|      |      |      | CA   | PA   | RI   | IL   | GA   | OK   | NC   |
| NY   |      |      | CT   | MN   | MA   | VT   | DE   | AZ   | ID   |
| 2013 | 2014 | 2015 | 2016 | 2017 | 2018 | 2019 | 2020 | 2021 | 2022 |
| RUSP |      |      |      |      |      |      |      |      |      |

| Table S8: Spinal Muscular Atrophy Newborn Screening Implementation Dates (as of December 2022, n = 48) |      |      |      |      |
|--------------------------------------------------------------------------------------------------------|------|------|------|------|
|                                                                                                        |      |      | NE   |      |
|                                                                                                        |      |      | WA   |      |
|                                                                                                        |      |      | RI   |      |
|                                                                                                        |      |      | IL   | OH   |
|                                                                                                        | NH   | CA   |      | SC   |
|                                                                                                        | WV   | FL   |      | AK   |
|                                                                                                        | MS   | MI   | SD   | OR   |
|                                                                                                        | WI   | AR   | ND   | NM   |
|                                                                                                        | KY   | TN   | IA   | VA   |
| NY                                                                                                     | GA   | KS   | TX   | ID   |
| IN                                                                                                     | MD   | WY   | OK   | AL   |
| MN                                                                                                     | VT   | DE   | NC   | NJ   |
| UT                                                                                                     | PA   | CT   | ME   | LA   |
| MA                                                                                                     | MO   | CO   | MT   | AZ   |
| 2018                                                                                                   | 2019 | 2020 | 2021 | 2022 |
| RUSP                                                                                                   |      |      |      |      |
